# Supplementary material for: Ex Vivo Treatment with Allogenic Mesenchymal Stem Cells of a Healthy Donor on Peripheral Blood Mononuclear Cells of Patients with Severe Alopecia Areata: Targeting Dysregulated T Cells and the Acquisition of Immunotolerance
Source: MDPI journal article supplement (doi:10.3390/ijms232113228), 2022-10-30
Supplement: s1 [file s1]

---

**Table S1.** PBMC in vitro real-time PCR primer sequences.

| <b>Species</b> | <b>Primer name</b> | <b>Forward (5' – 3')</b>      | <b>Reverse (5' – 3')</b>   |
|----------------|--------------------|-------------------------------|----------------------------|
| Human          | IL-1A              | CAG TTC TGC TGA CTG GGT GA    | AGG TGC TGA CCT AGG CTT GA |
|                | IL-2RG             | CCA CTC TGT GGA AGT GCT CA    | TCC GTT CCA GCC AGA AAT AC |
|                | IL-10              | TCA TTC CCC AAC CAC TTC AT    | GTA GAG ACG GGG TTT CAC CA |
|                | IL-15              | GCC TTC ATG GTA TTG GGA A     | TGC TGT TAC TTT GCA ACT GG |
|                | IL-17              | ACC AAT CCC AAA AGG TCC TC    | GGG GAC AGA GTT CAT GTG GT |
|                | IL-18              | AGC TGA AGA TGA TGA AAA CCT G | ATA GAG GCC GAT TTC CTT GG |
|                | IFN- $\gamma$      | GCA TGG CTC TCC TCT TTC TC    | CTG TGG CAT GAT CTG GTA CT |
|                | CCR7               | TGA GCG TGT CTT TGT TTT GC    | CTT TCA GCC TCT TGG TCC TG |
|                | CCR10              | CTC AAT CCC GTT CTC TAC GC    | GAT TCG CAG CCC TAG TTG TC |
|                | Foxp3              | TGC CTC CTC TTC TTC CTT GA    | GAG CTG GTG CAT GAA ATG TG |
|                | TNF- $\alpha$      | TCT ATC TGG GAG GGG TCT TC    | TGA TCC CAA AGT AGA CCT GC |
|                | TGF- $\beta$ 2     | AAC TGT CTG CCC AGT TGT TA    | GCT GAG ACG TCA AAT CGA AC |

---
